# Supplementary material
Source: PubMed Central journal article supplement (PMC534618)
Supplement: nar_32_20_5973__1.pdf [file nar_32_20_5973__1.pdf]

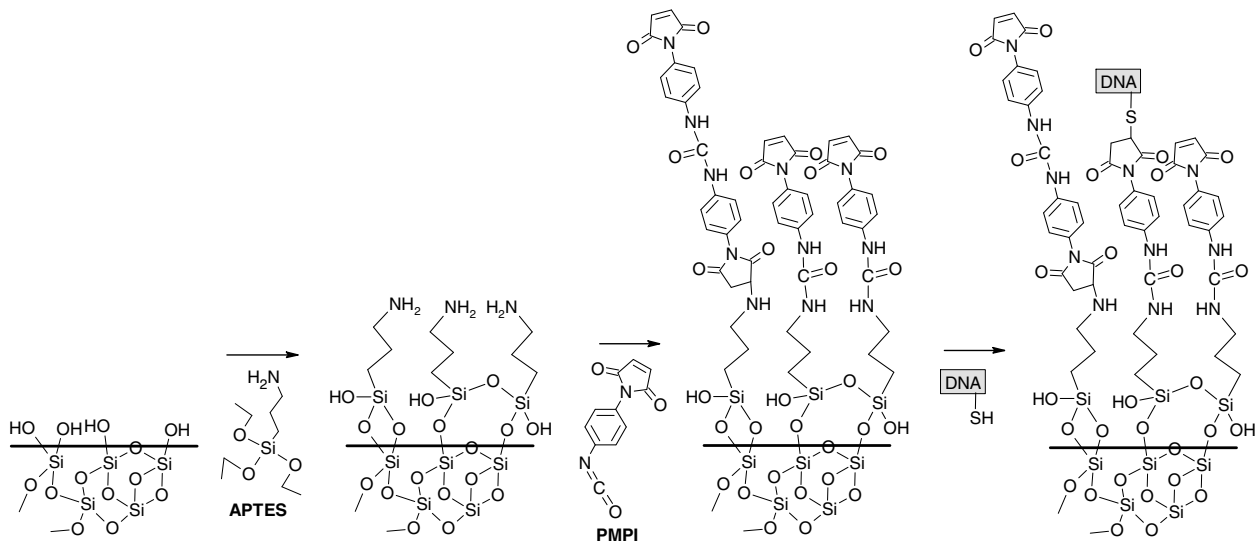

**Figure 1S.** Surfaces were derivatized in three steps: **(i)** silylation with APTES to introduce amine groups, **(ii)** conversion of the amine-functional into a maleimide-functional surface by reaction with PMPI, and **(iii)** attachment of thiol-terminated DNA through the maleimide groups.
